# Supplementary material for: Red Cabbage Modulates Composition and Co-Occurrence Networks of Gut Microbiota in a Rodent Diet-Induced Obesity Model
Source: MDPI journal article supplement (doi:10.3390/foods13010085), 2023-12-26
Supplement: s1 [file s1]

## **Electronic Supplementary Information**

**Red Cabbage Modulates Composition and Co-Occurrence  
Networks of Gut Microbiota in a Rodent Diet-Induced  
Obesity Model**

**Table S1.** Primer sequence used for microbial analysis by real-time PCR.

| Bacteria                       | Direction | Sequence (5'–3')                 |
|--------------------------------|-----------|----------------------------------|
| Bacteroidetes                  | Forward   | GGARCATGTGGTTTAATTCGATGAT        |
|                                | Reverse   | AGCTGACGACAACCATGCAG             |
| Firmicutes                     | Forward   | GGAGYATGTGGTTTAATTCGAAGCA        |
|                                | Reverse   | AGCTGACGACAACCATGCAC             |
| <i>Prevotella</i>              | Forward   | TCCTACGGGAGGCAGCAGT              |
|                                | Reverse   | CAATCGGAGTTCTTCGTG               |
| <i>Enterobacteriaceae</i>      | Forward   | CATTGACGTTACCCGAGAAGAAGC         |
|                                | Reverse   | CTCTACGAGACTCAAGCTTGC            |
| <i>Ruminococcus</i>            | Forward   | GGCGGCCTACTGGGCTTT               |
|                                | Reverse   | CCA GGT GGA TAA CTT ATT GTG TTAA |
| <i>Bifidobacteria</i>          | Forward   | TCGCGTCYGGTGTGAAAG               |
|                                | Reverse   | CCACATCCAGCRTCCAC                |
| <i>Lactobacillus</i>           | Forward   | GAGGCAGCAGTAGGGAATCTTC           |
|                                | Reverse   | GGCCAGTTACTACCTCTATCCTTCTTC      |
| <i>Akkermansia muciniphila</i> | Forward   | CAGCACGTGAAGGTGGGGAC             |
|                                | Reverse   | CCT TGC GGTTGGCTTCAGAT           |

**Table S2.** Relative abundance (%) of the bacterial taxa at phylum level in cecal samples of mice grouped by diet (LF: LF diet, HF: HF diet, LFRC: LF diet supplemented with RC powder, HFRC: HF diet supplemented with RC powder).

| Phylum          | Diet       |            |             |            |
|-----------------|------------|------------|-------------|------------|
|                 | LF         | HF         | LFRC        | HFRC       |
| Bacteroidetes   | 60.00±2.45 | 53.47±6.21 | 47.31±10.30 | 42.6±6.53  |
| Firmicutes      | 34.41±2.19 | 39.19±5.92 | 42.17±11.50 | 50.58±7.34 |
| Proteobacteria  | 3.18±0.61  | 4.78±0.26  | 2.57±0.61   | 3.81±0.68  |
| Deferribacteres | 2.17±0.78  | 2.38±1.24  | 4.06±1.43   | 2.93±1.09  |
| TM7             | 0.08±0.04  | 0.09±0.11  | 0.09±0.09   | 0.05±0.04  |
| Actinobacteria  | 0.01±0.00  | 0.01±0.00  | 0.02±0.01   | 0.02±0.01  |

**Table S3.** The topological properties of the global network are inferred by using the network pipeline based on random matrix theory (RMT) under various experimental conditions.

| Network Indexes                               | LF         | HF          | LFRC       | HFRC       |
|-----------------------------------------------|------------|-------------|------------|------------|
| Total nodes                                   | 247        | 245         | 233        | 217        |
| Total links                                   | 416        | 483         | 314        | 406        |
| Total modules                                 | 23         | 23          | 38         | 27         |
| Modularity (M)                                | 0. 819     | 0. 72       | 0. 772     | 0. 704     |
| R square of power-law                         | 0. 71      | 0. 80       | 0. 818     | 0. 825     |
| Average degree (avgK)                         | 3. 368     | 3. 94       | 2. 695     | 3. 742     |
| Average clustering coefficient (avgCC)        | 0. 304     | 0. 32       | 0. 145     | 0. 17      |
| Average path distance (GD)                    | 8. 217     | 6. 97       | 6. 603     | 4. 905     |
| Geodesic efficiency (E)                       | 0. 166     | 0. 20       | 0. 2       | 0. 261     |
| Harmonic geodesic distance (HD)               | 6. 039     | 4. 92       | 4. 992     | 3. 826     |
| Maximal degree                                | 13         | 16          | 12         | 15         |
| Nodes with max degree                         | OTU 262625 | OTU 1136443 | OTU 263705 | OTU 336691 |
|                                               |            | OTU 1684221 |            |            |
|                                               |            | OTU 329790  |            |            |
|                                               |            | OTU 317633  |            |            |
| Centralization of degree (CD)                 | 0. 039     | 0. 05       | 0. 04      | 0. 053     |
| Maximal betweenness                           | 6815. 31   | 4996. 26    | 3378. 541  | 2751. 546  |
| Nodes with max betweenness                    | OTU 262677 | OTU 275366  | OTU 275366 | OTU 339031 |
| Centralization of betweenness (CB)            | 0. 204     | 0. 15       | 0. 114     | 0. 11      |
| Maximal stress centrality                     | 48167      | 33304       | 20539      | 31008      |
| Nodes with max stress centrality              | 262677     | 418501      | 275366     | 339031     |
| Centralization of stress centrality (CS)      | 1. 451     | 1. 04       | 0. 713     | 1. 262     |
| Maximal eigenvector centrality                | 0. 355     | 0. 31       | 0. 435     | 0. 31      |
| Nodes with max eigenvector centrality         | OTU 353012 | OTU 317633  | OTU 263705 | OTU 277208 |
| Centralization of eigenvector centrality (CE) | 0. 335     | 0. 28       | 0. 416     | 0. 279     |
| Density (D)                                   | 0. 014     | 0. 02       | 0. 012     | 0. 017     |
| Reciprocity                                   | 1. 00      | 1. 00       | 1. 00      | 1. 00      |
| Transitivity (Trans)                          | 0. 359     | 0. 35       | 0. 182     | 0. 214     |
| Connectedness (Con)                           | 0. 78      | 0. 63       | 0. 515     | 0. 481     |
| Efficiency                                    | 0. 987     | 0. 98       | 0. 985     | 0. 972     |
| Hierarchy                                     | 0. 00      | 0. 00       | 0. 00      | 0. 00      |
| Lubness                                       | 1. 00      | 1. 00       | 1. 00      | 1. 00      |

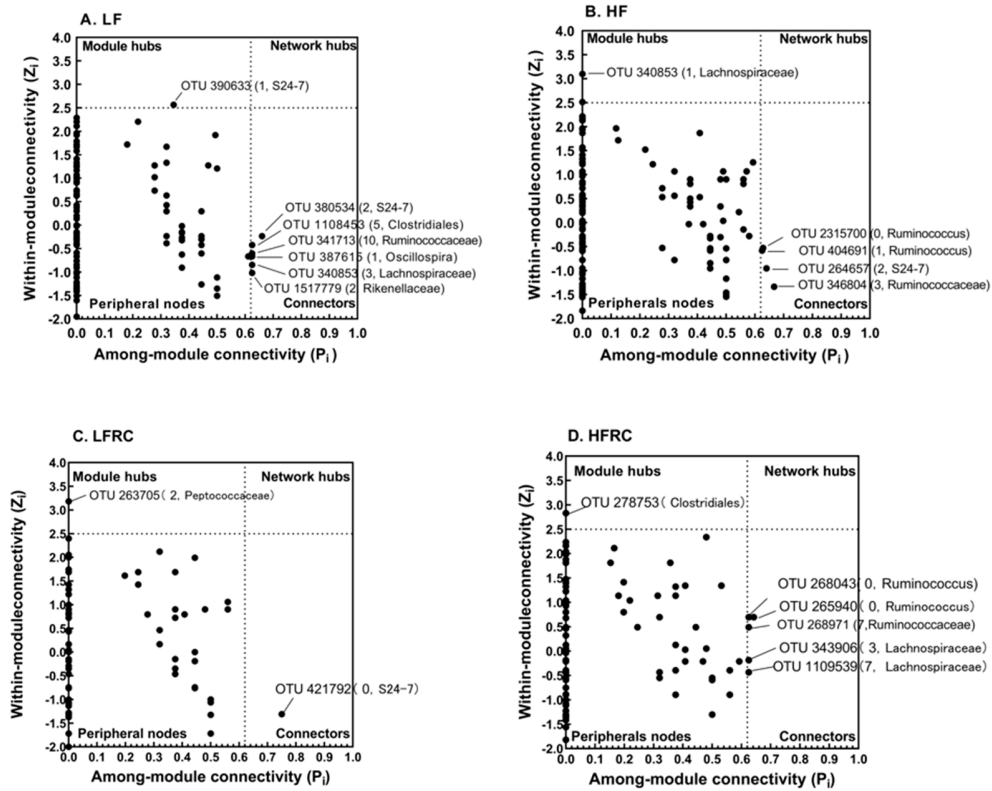

**Figure S1.** The Zi-Pi diagram shows the distribution of the topological role of OTU in the network. Each point represents an OTU under different dietary groups (LF: LF diet, HF: HF diet, LFRC: LF diet with RC powder, HFRC: HF diet with RC powder). According to the scatter diagram of in-tra-module connectivity ( $Z_i$ ) and inter-module connectivity ( $P_i$ ), the topological function of each OTU is determined. The module hub and connector are marked with OTU number. In parentheses are the module number and phylogenetic associations.
